# Supplementary material for: IL-8 signaling is involved in resistance of lung carcinoma cells to erlotinib
Source: PubMed Central journal article supplement (PMC5173114; doi:10.18632/oncotarget.9662), 2016-05-27
Supplement: oncotarget-07-42031-s001.pdf [file oncotarget-07-42031-s001.pdf]

## IL-8 signaling is involved in resistance of lung carcinoma cells to erlotinib

### SUPPLEMENTARY FIGURE

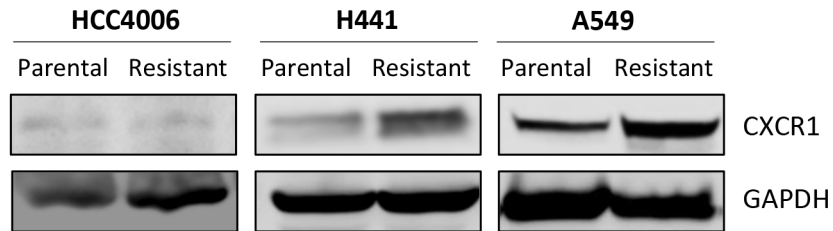

**Supplementary Figure S1: IL-8 signaling is upregulated in erlotinib-resistant cells.** Western blot analysis of protein lysates from indicated tumor cell pairs for expression of the IL-8 receptor alpha (CXCR1).
